# Supplementary material for: Simple and rapid hydrogenation of p-nitrophenol with aqueous formic acid in catalytic flow reactors
Source: PubMed Central journal article supplement (PMC3701373; doi:10.3762/bjoc.9.129), 2013-06-14
Supplement: Beilstein_J_Org_Chem-09-1156-s001.pdf [file Beilstein_J_Org_Chem-09-1156-s001.pdf]

# Supporting Information

for

## Simple and rapid hydrogenation of *p*-nitrophenol with aqueous formic acid in catalytic flow reactors

Rahat Javaid\*, Shin-ichiro Kawasaki, Akira Suzuki and Toshishige M. Suzuki\*

Address: Research Center for Compact Chemical System, National Institute of  
Advanced Industrial Science and Technology, AIST, 4-2-1 Nigatake, Miyagino-ku,  
Sendai, Miyagi 983-8551, Japan

Email: Rahat Javaid\* - [rahat-javid@aist.go.jp](mailto:rahat-javid@aist.go.jp); Toshishige M. Suzuki\* - [tm-suzuki@aist.go.jp](mailto:tm-suzuki@aist.go.jp)

\* Corresponding author

## Analytical and spectral data

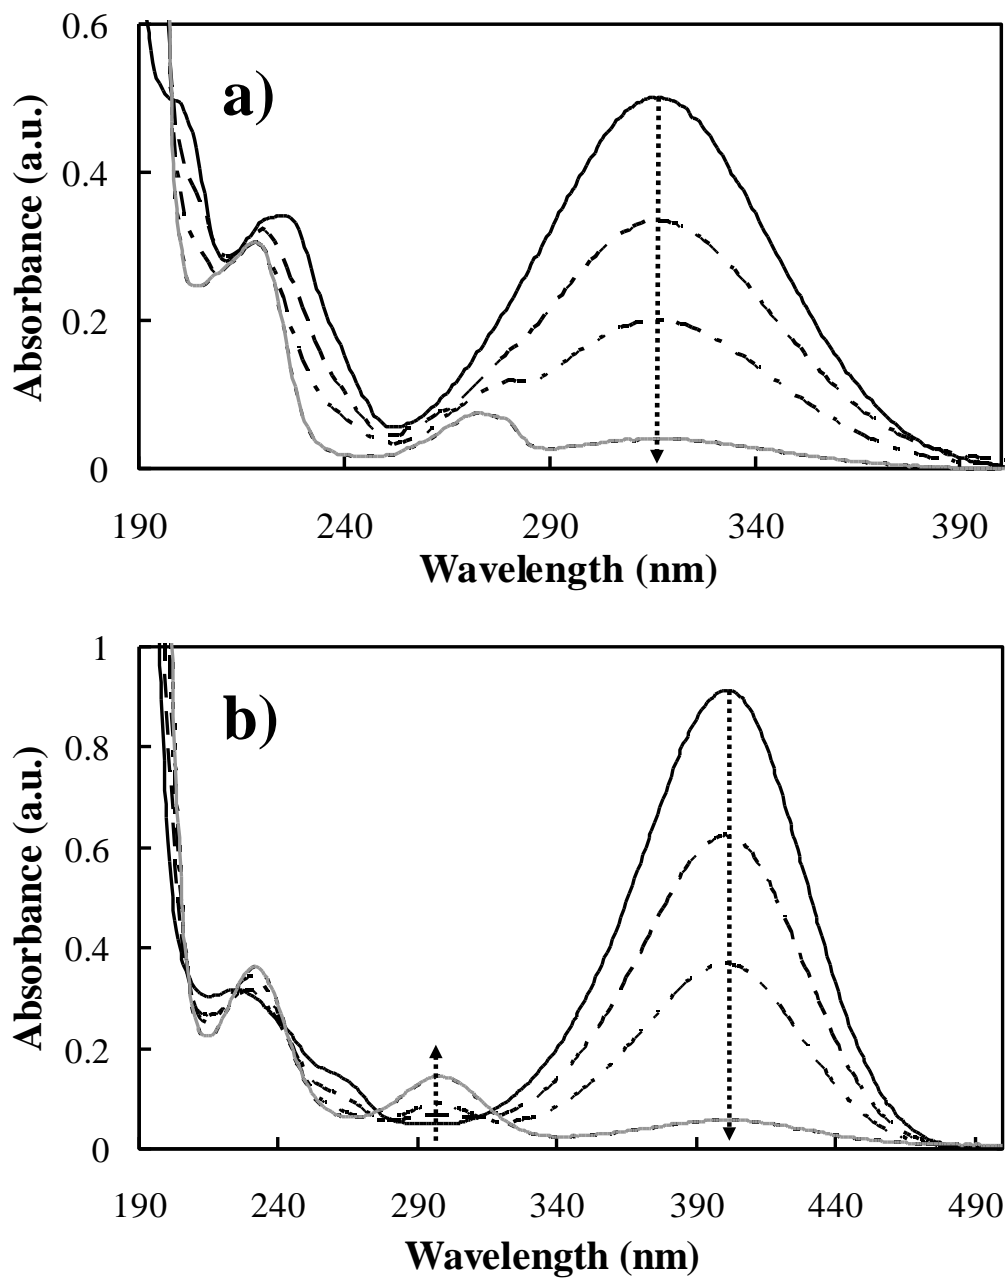

**Figure:** UV-vis spectral change of *p*-nitrophenol during the hydrogenation reaction by use of different concentrations of formic acid ( — Original --- 0.01 M - - - 0.03 M .....0.05 M ———0.1 M). Measured pH (a) pH = 2.5 and (b) pH = 5.0. Concentration of *p*-nitrophenol =  $1 \times 10^{-4}$  M.
